# Supplementary material for: Gut microbiota modulates bleomycin-induced acute lung injury response in mice
Source: Springer Nature journal article supplement (doi:10.1186/s12931-022-02264-7), 2022-12-10
Supplement: MOESM1 [file 12931_2022_2264_MOESM1_ESM.pdf]

## **Gut microbiota modulates bleomycin-induced acute lung injury response in mice**

Young me Yoon, Cara L Hrusch, Na Fei, Gabriel M Barrón, Kathleen AM Mills, Maile K Hollinger, Tania E Velez, Vanessa A Leone, Eugene B Chang, Anne I Sperling

**Additional file 1**

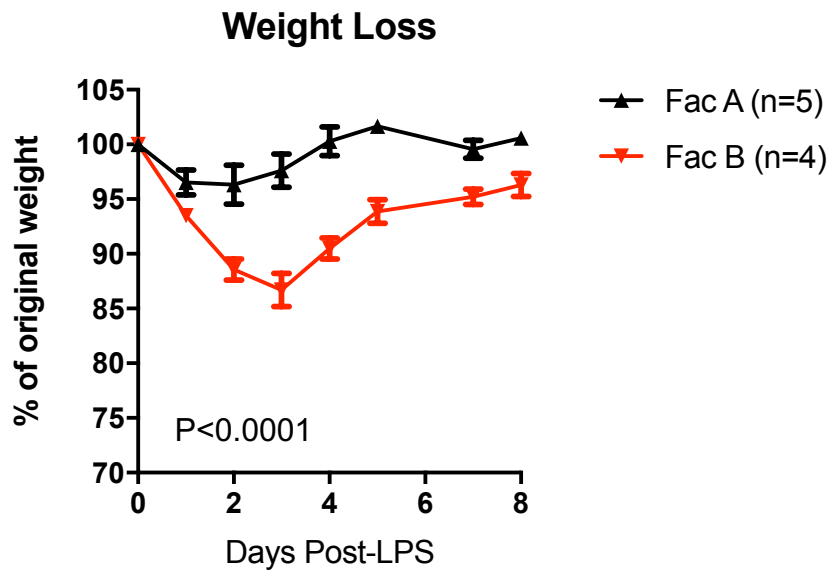

Fig S1. Intratracheal LPS-induced ALI responses in mice housed in the two facilities. Mice were challenged with 1mg/kg LPS. 2-way ANOVA was performed to assess statistical significance.

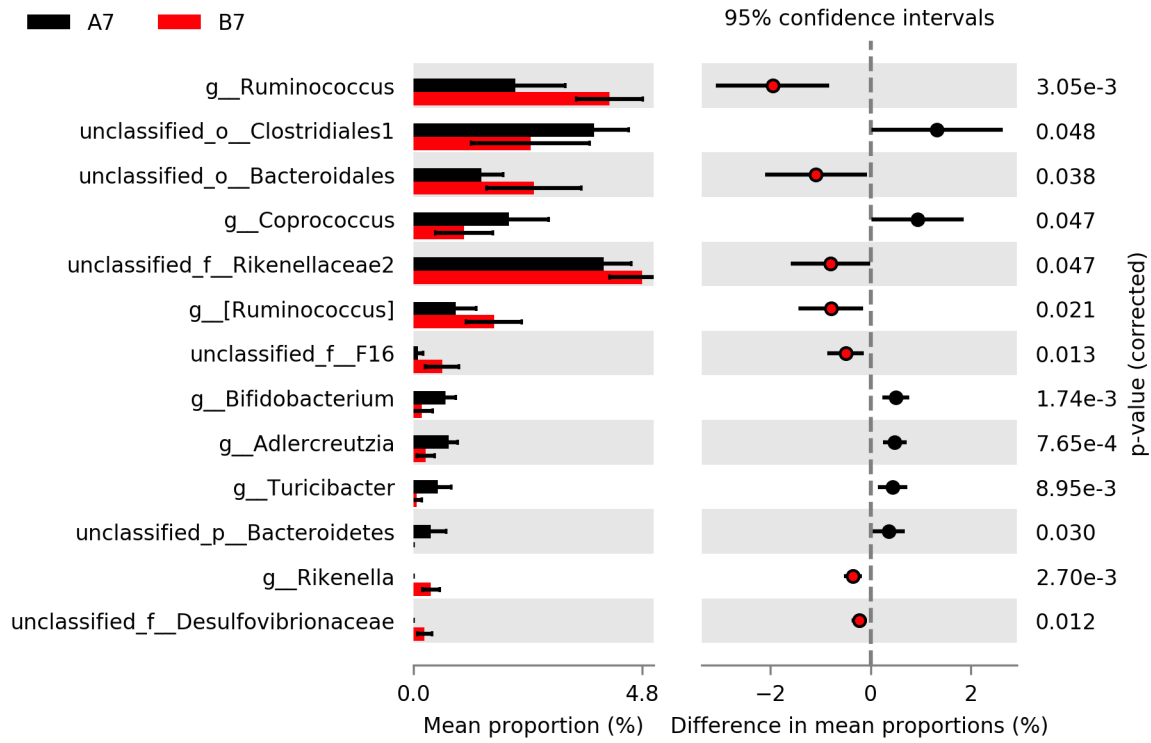

**Fig S2. 16S rRNA sequencing of conventionalized ex-GF mice on D7 after BLM challenge.**

Differential abundance of fecal microbial taxa between animals in the two facilities at 7-days post BLM treatment was analyzed using the Statistical Analysis of Metagenomic Profiles (STAMP). P-value of 0.05 was used as a cutoff.

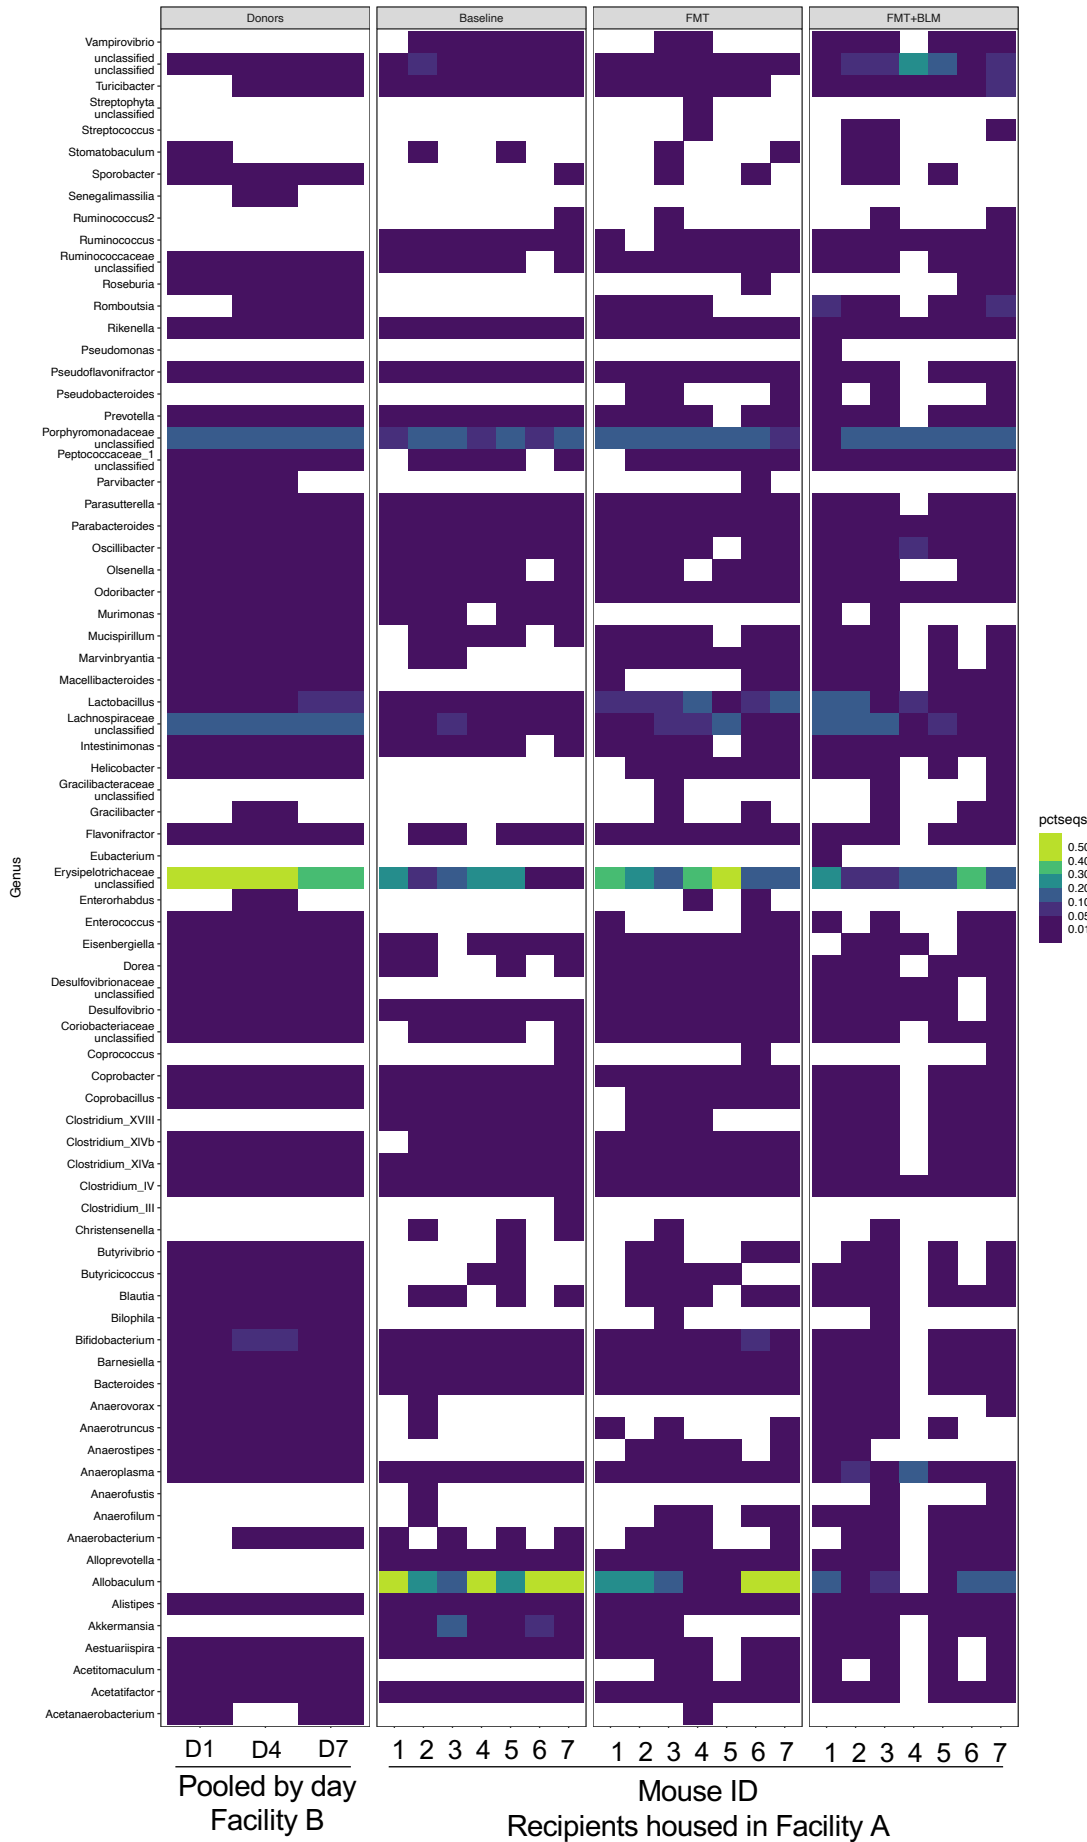

**Fig S3. Full list of taxa resolved from fecal samples from donor and recipient mice in the Facility B-to-A FMT experiment.** Heatmap visualizing percent sequences of all the taxa resolved to genus level. Fecal samples from donor mice of Facility B microbiota were pooled and sampled on each day of gavage treatment. Fecal samples from 7 recipient mice in Facility A were collected longitudinally at baseline, 10-days after the first dose of gavage (FMT), and 7-days after bleomycin challenge (FMT+BLM).

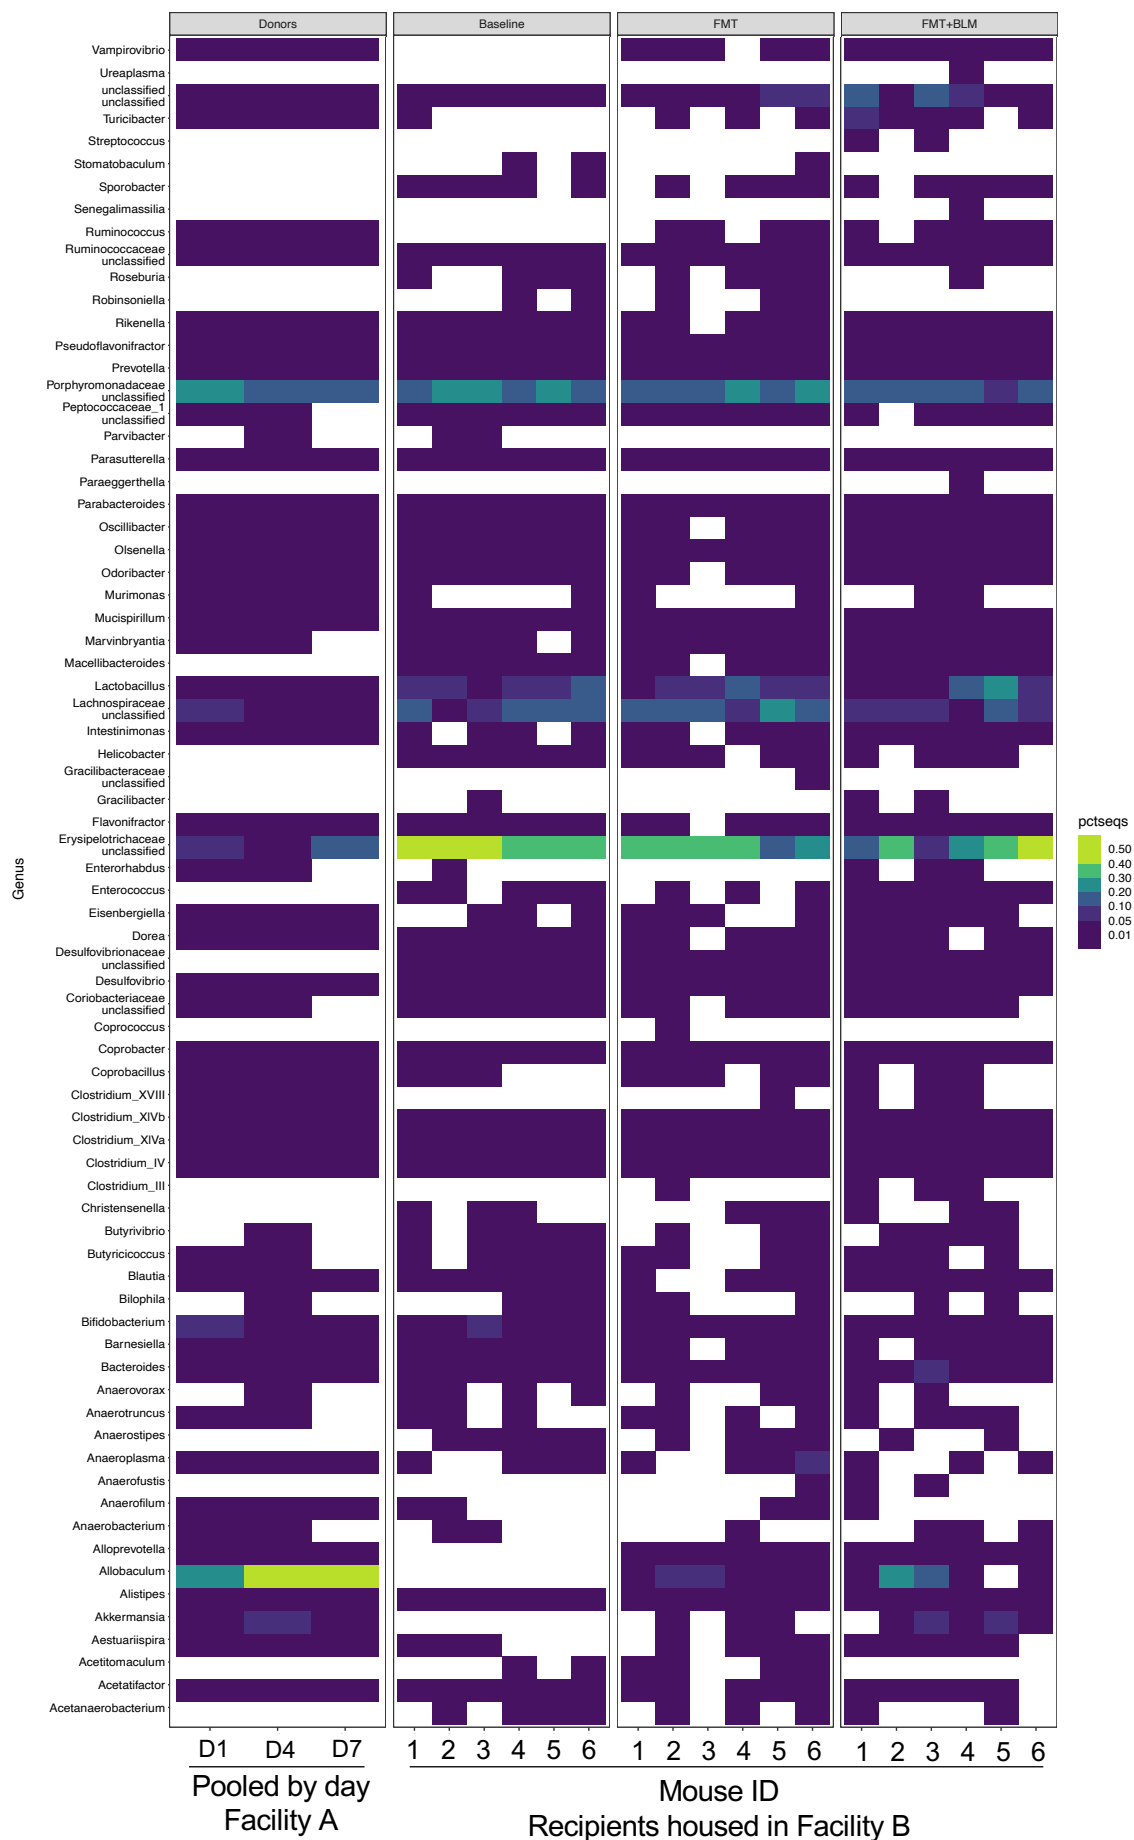

**Fig S4. Unchanged lung injury outcome in Fac A microbiome recipients is not due to the lack of colonization of additional species.** Heatmap visualizing percent sequences of all the taxa resolved to genus level. Fecal samples from donor mice of Facility A microbiota were pooled and sampled on each day of gavage treatment. Fecal samples from 6 recipient mice in Facility B were collected longitudinally at baseline, 10-days after the first dose of gavage (FMT), and 7-days after bleomycin challenge (FMT+BLM).

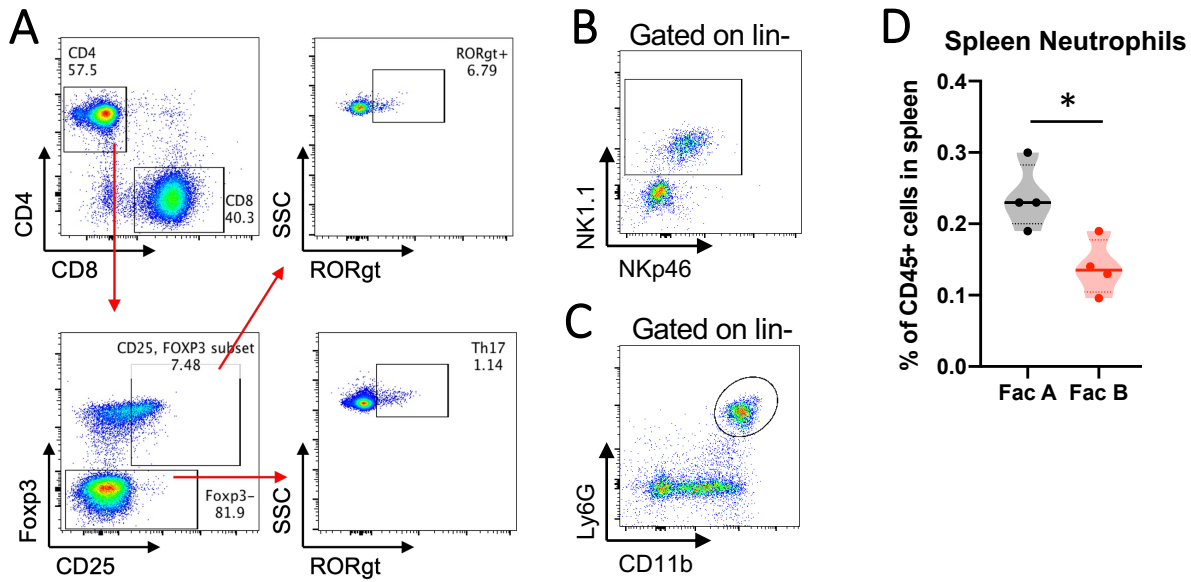

**Fig S5. Examples of flow cytometry gating strategies and frequencies of spleen neutrophils in naïve animals.** (A) Gating strategies for RORγt+ CD25+ Treg and Th17 populations, using gLN cells as representative. (B) Gating strategy for NK cells in lungs. Cells were pre-gated on CD45+, TCRb-, CD19-, non-AM, non-neutrophil, non-Eosinophil, non-DC population. (C) Gating strategy for neutrophils in lungs. Cells were pre-gated on CD45+, TCRb-, CD19-, non-AM population. (D) Frequency of neutrophils in spleens of unperturbed animals housed in the two facilities. T-test was done to obtain the p-value.

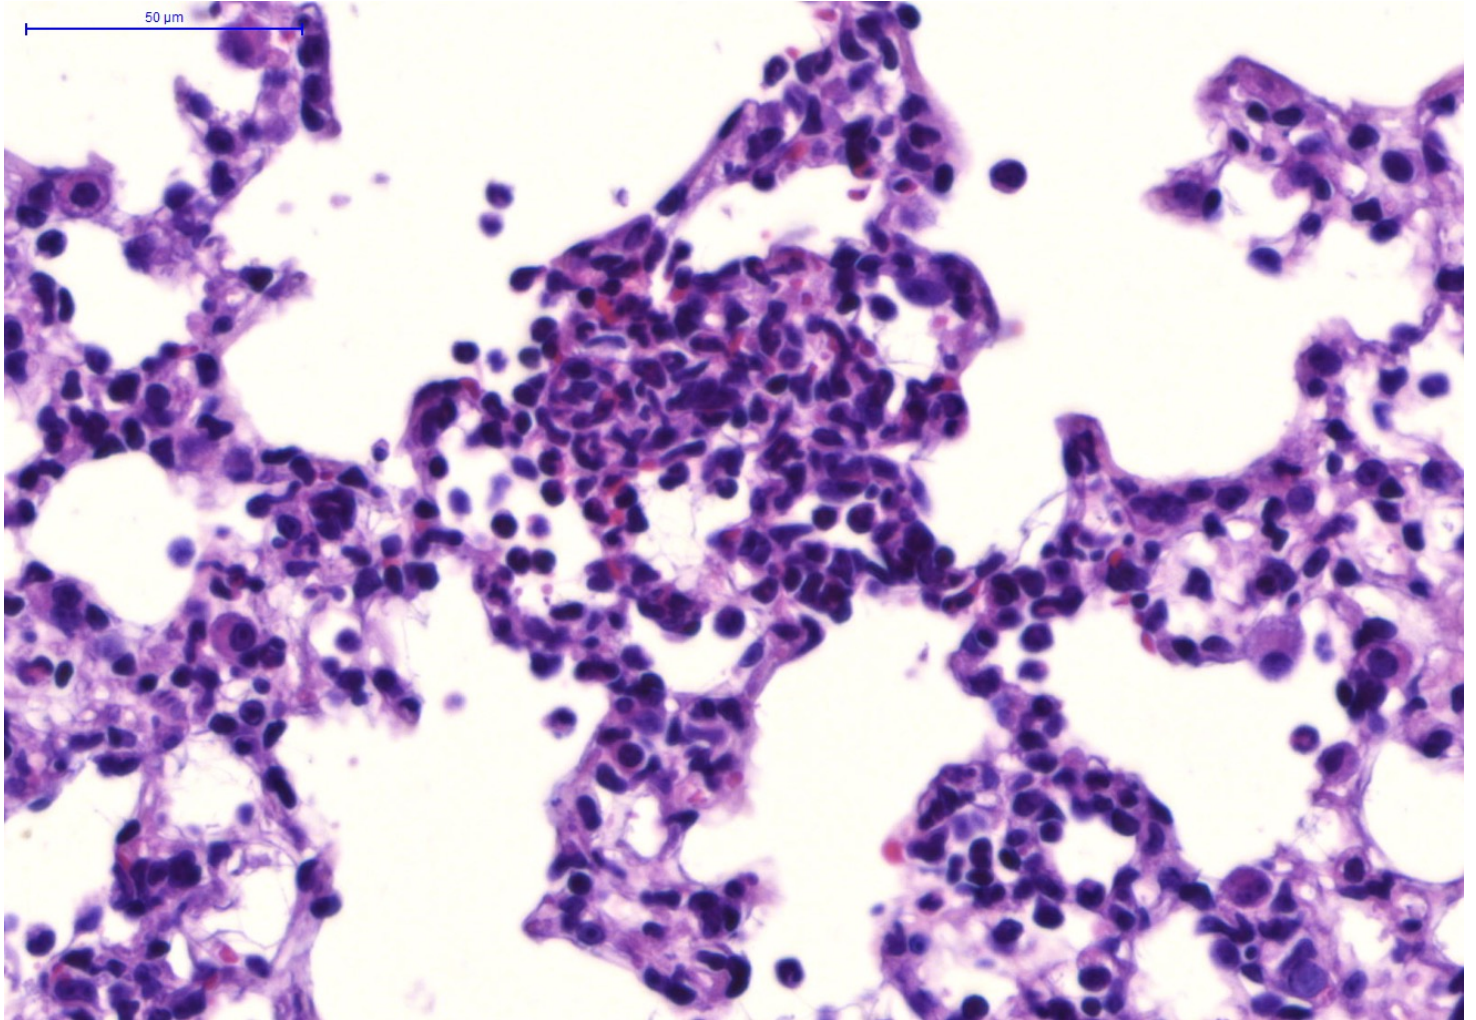

**Fig S6. Hematoxylin and eosin (H&E) staining of a mouse lung section on day 3 post-BLM challenge.** An example of patchy neutrophilic alveolitis that are found in BLM-treated mice in both housing facilities. The image shown here is from a Fac B mouse, but a similar histopathological pattern was observed in Fac A mice. For staining, left lungs harvested from mice on day 3 post-BLM treatment were formalin fixed and paraffine embedded. Lung blocks were sectioned at 5 $\mu$ m thick and stained with H&E. Slides were imaged with a 40x objective using the CRI Panoramic SCAN. The scale bar is 50 $\mu$ m long.

**Table S1. Frequencies of innate and adaptive immune cell populations in the lungs from unperturbed 15-17 weeks old animals raised in the respective housing facilities (n=8 per facility). Values are the percent of CD45+ cells ( $\pm$  standard deviation), and p-values are from t-test.**

| Lung immunophenotypes at baseline. Values as percent of CD45+ ( $\pm$ standard deviation) |                     |                     |         |
|-------------------------------------------------------------------------------------------|---------------------|---------------------|---------|
| Cell population                                                                           | Fac A               | Fac B               | P-value |
| Neutrophils                                                                               | 7.86 ( $\pm$ 2.94)  | 4.78 ( $\pm$ 0.71)  | 0.01    |
| Eosinophils                                                                               | 2.87 ( $\pm$ 0.66)  | 3.39 ( $\pm$ 1.17)  | 0.29    |
| DC                                                                                        | 5.13 ( $\pm$ 1.45)  | 6.46 ( $\pm$ 1.47)  | 0.09    |
| Monocyte                                                                                  | 12.07 ( $\pm$ 1.86) | 13.76 ( $\pm$ 0.97) | 0.04    |
| NK cells                                                                                  | 7.88 ( $\pm$ 1.46)  | 9.46 ( $\pm$ 1.27)  | 0.04    |
| B cells                                                                                   | 36.45 ( $\pm$ 7.57) | 36.04 ( $\pm$ 4.27) | 0.90    |
| T <sub><math>\gamma\delta</math></sub> cells                                              | 5.16 ( $\pm$ 0.75)  | 5.33 ( $\pm$ 0.54)  | 0.62    |
| T <sub><math>\alpha\beta</math></sub> cells                                               | 19.58 ( $\pm$ 4.06) | 20.04 ( $\pm$ 2.26) | 0.78    |
| CD8 T cells                                                                               | 4.14 ( $\pm$ 0.49)  | 4.78 ( $\pm$ 1.01)  | 0.13    |
| CD4 T cells                                                                               | 10.06 ( $\pm$ 2.64) | 9.23 ( $\pm$ 1.19)  | 0.43    |
| T <sub>conv</sub>                                                                         | 8.60 ( $\pm$ 2.32)  | 7.85 ( $\pm$ 1.17)  | 0.43    |
| Th1                                                                                       | 1.29 ( $\pm$ 0.53)  | 1.40 ( $\pm$ 0.60)  | 0.69    |
| Th2                                                                                       | 0.42 ( $\pm$ 0.23)  | 0.42 ( $\pm$ 0.17)  | 0.93    |
| Th17                                                                                      | 0.53 ( $\pm$ 0.47)  | 0.23 ( $\pm$ 0.07)  | 0.10    |
| T <sub>reg</sub> (all Foxp3+)                                                             | 1.41 ( $\pm$ 0.36)  | 1.31 ( $\pm$ 0.22)  | 0.53    |
| TBET+ T <sub>reg</sub>                                                                    | 0.13 ( $\pm$ 0.04)  | 0.15 ( $\pm$ 0.09)  | 0.52    |
| GATA3+ T <sub>reg</sub>                                                                   | 0.17 ( $\pm$ 0.09)  | 0.18 ( $\pm$ 0.07)  | 0.79    |
| ROR $\gamma$ t+ T <sub>reg</sub>                                                          | 0.07 ( $\pm$ 0.04)  | 0.07 ( $\pm$ 0.03)  | 0.91    |
| CD25+ T <sub>reg</sub>                                                                    | 0.65 ( $\pm$ 0.18)  | 0.60 ( $\pm$ 0.11)  | 0.52    |
| TBET+ CD25+ T <sub>reg</sub>                                                              | 0.04 ( $\pm$ 0.02)  | 0.05 ( $\pm$ 0.06)  | 0.49    |
| GATA3+ CD25+ T <sub>reg</sub>                                                             | 0.08 ( $\pm$ 0.05)  | 0.08 ( $\pm$ 0.04)  | 0.83    |
| ROR $\gamma$ t+ CD25+ T <sub>reg</sub>                                                    | 0.03 ( $\pm$ 0.02)  | 0.04 ( $\pm$ 0.02)  | 0.29    |

Table S2. List of antibodies used for flow cytometry analysis

| Antigen  | Fluorophore          | Clone       | Company     | Dilution Factor |
|----------|----------------------|-------------|-------------|-----------------|
| CD3      | BUV395               | 17A2        | BD          | 200             |
| CD4      | BUV805               | GK1.5       | BD          | 200             |
| CD44     | Pacific Blue         | IM7         | BioLegend   | 400             |
| CD8      | BV510                | 53-6.7      | BioLegend   | 200             |
| CD45     | BV605, BV785, BUV805 | 30-F11      | BioLegend   | 200             |
| CD62L    | BV711                | MWL-14      | BioLegend   | 200             |
| CD25     | BV786                | 3C7         | BD          | 100             |
| TCRgd    | APC-Fire750          | GL3         | BioLegend   | 200             |
| Helios   | FITC                 | 22F6        | BioLegend   | 400             |
| RORgt    | PerCP-Cy5.5          | Q31-378     | BD          | 100             |
| EOMES    | PE                   | Dan11mag    | Invitrogen  | 400             |
| T-bet    | PE-Cy7               | 4B10        | BioLegend   | 200             |
| Foxp3    | APC                  | FJK-16s     | Invitrogen  | 400             |
| GATA3    | PE-CF594             | L50-823     | BD          | 50              |
| NK1.1    | FITC                 | PK136       | BioLegend   | 400             |
| MHC II   | PerCP-Cy5.5          | M5/114.15.2 | BioLegend   | 400             |
| Ter119   | APC                  | TER-119     | BioLegend   | 200             |
| F4/80    | APC-eFluor780        | BM8         | eBioscience | 200             |
| NKp46    | BV421                | 29A1.4      | BioLegend   | 50              |
| CD11B    | BV510, PE-dazzle     | M1/70       | BioLegend   | 400             |
| Ly6C     | BV605, APC-cy7       | HK1.4       | BioLegend   | 200             |
| Ly6G     | BV711                | 1A8         | BioLegend   | 200             |
| CD19     | BUV737               | 1D3         | BD          | 200             |
| Siglec F | PE, BV421            | E50-2440    | BD          | 200             |
| CD11C    | PE-cy7, APC          | N418        | BioLegend   | 200             |
| CD80     | FITC                 | 16-10A1     | BioLegend   | 600             |
| CD86     | BV605                | GL-1        | BioLegend   | 200             |
| PDCA1    | BV650                | 927         | BioLegend   | 100             |
| PD-L1    | BV785                | 10F.9G2     | BioLegend   | 200             |
| CD24     | BUV396               | M1/69       | BD          | 400             |
| CD103    | PE                   | 2E7         | BioLegend   | 800             |
